# Supplementary material for: Osmanthus-Loaded PVP/PVA Hydrogel Inhibits the Proliferation and Migration of Oral Squamous Cell Carcinoma Cells CAL-27
Source: MDPI journal article supplement (doi:10.3390/polym14245399), 2022-12-09
Supplement: s1 [file s1]

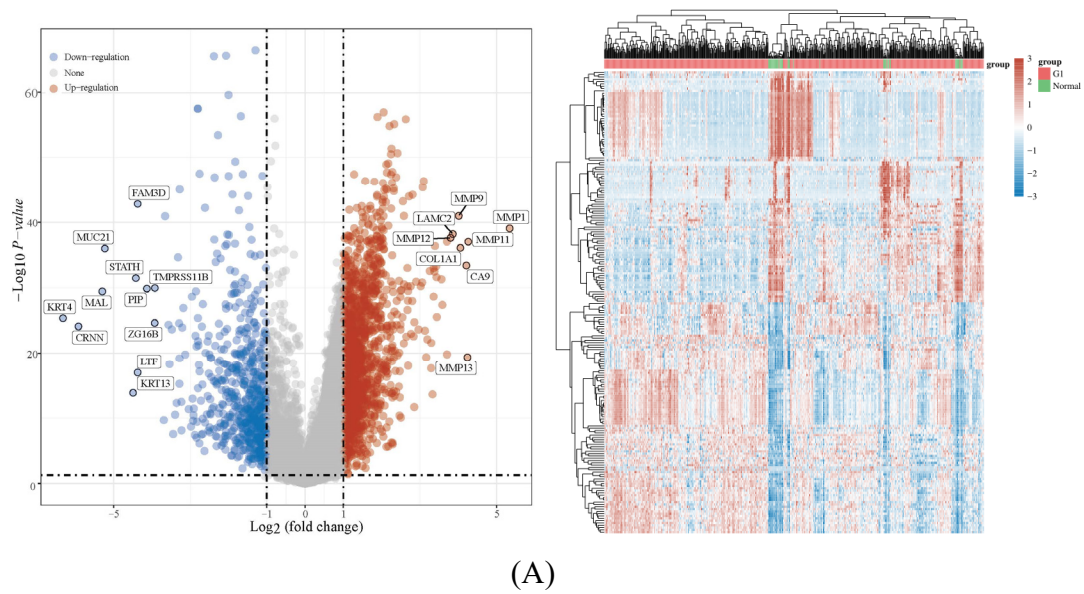

(A)

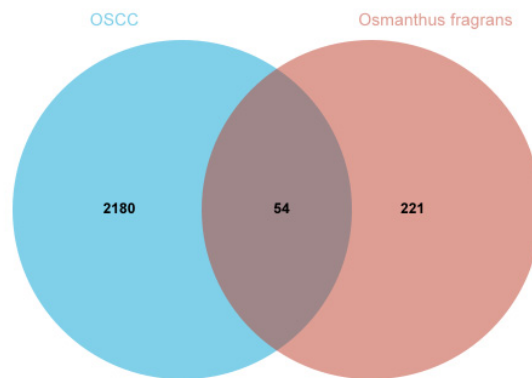

(B)

Figure S1. A. The differential genes of OSCC. Blue: down-regulated genes, Red: up-regulated genes, gray: undifferentially expressed genes. B. Identification of overlapping genes of differential genes of OSCC and osmanthus targeted genes.

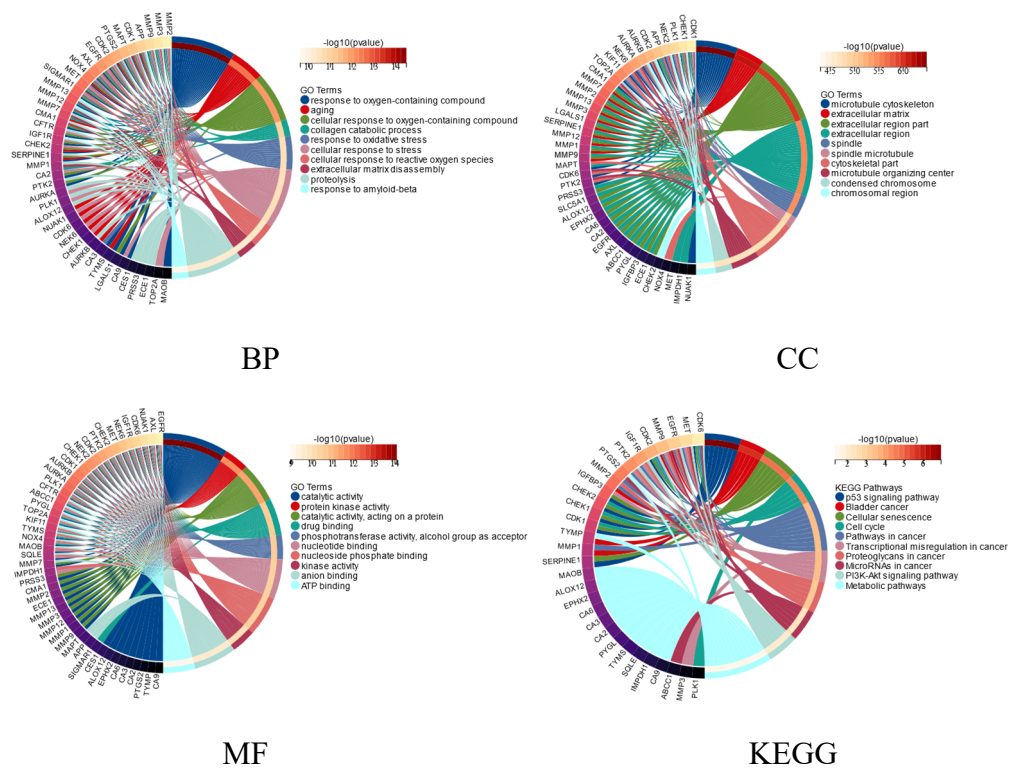

Figure S2. GO enrichment and KEGG pathway analysis represented in a chord plot. A. biological processes; B. cellular components; C. molecular functions; D. signaling pathways.

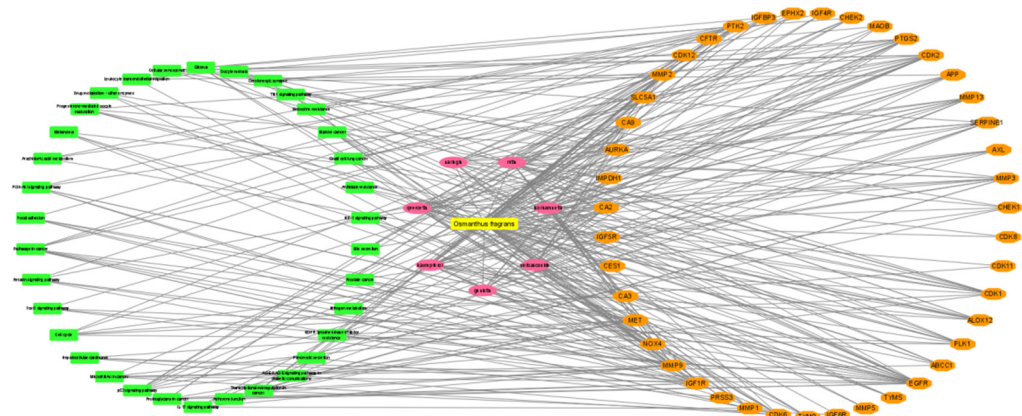

Figure S3. Component-Target-Pathway. Yellow: Osmanthus fragrans extract; Red: 7 main components; Orange: 54 overlapping genes; Green: Related KEGG pathway.



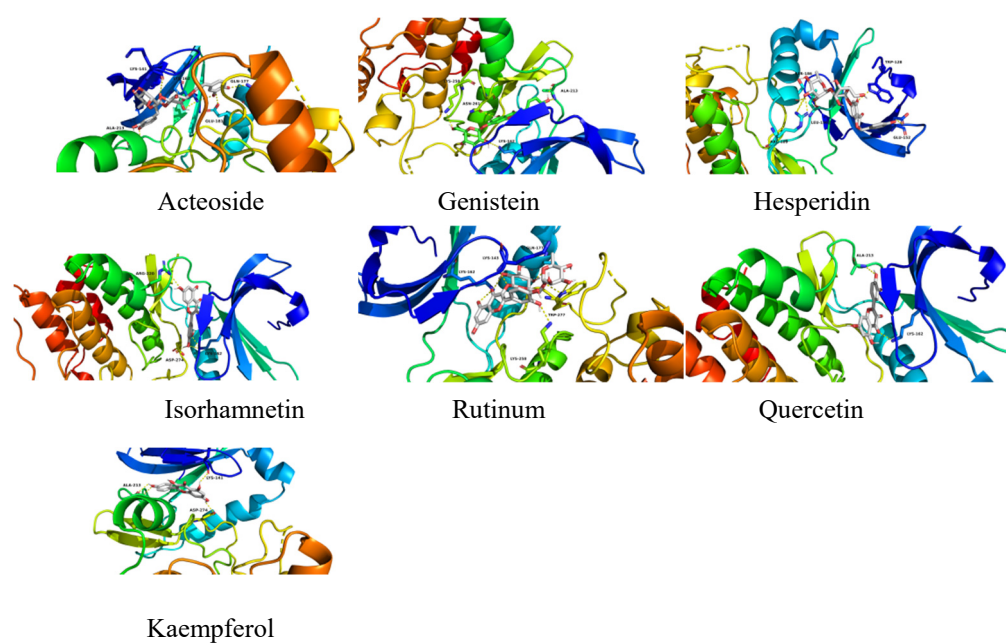

(A)

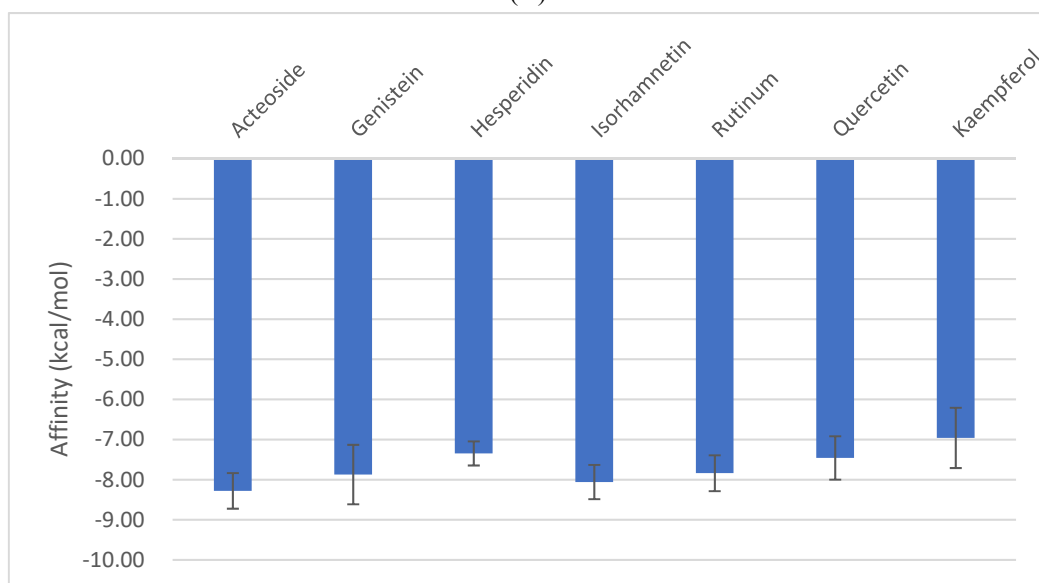

(B)

Figure S5. Molecular docking models of osmanthus extract and AURKA. A. 7 main components of osmanthus extract were docked with AURKA; B. the affinity of each component with AURKA.
